# Supplementary material for: Tryptophan metabolism, its relation to inflammation and stress markers and association with psychological and cognitive functioning: Tasmanian Chronic Kidney Disease pilot study
Source: Springer Nature journal article supplement (doi:10.1186/s12882-016-0387-3), 2016-11-10
Supplement: MOESM2 [file 11034648]

## **Supplementary Information: Chromatography and mass spectrometry conditions**

### **1. Chromatography conditions:**

The autosampler was kept at 10°C, and 20µL of each prepared serum sample was loaded to the analytical column maintained at 30°C in a column oven.

Mobile phase A was 0.1% (v/v) Formic acid in water and B was 0.1% (v/v) Formic acid in Acetonitrile, and the flow rate was 0.3mL/min (typical to the “solvent saver” column in use). Table 1 describes the eluent gradient. The long run was necessary to elute and clean the column from more hydrophobic and highly-retained compounds in the serum samples, such as fatty acids, sterols etc.

**Table 1. Chromatography gradient conditions:**

| Time (min) | Eluent A | Eluent B |
|------------|----------|----------|
| 0.0        | 95%      | 5%       |
| 2.5        | 95%      | 5%       |
| 5.0        | 70%      | 30%      |
| 18.0       | 0%       | 100%     |
| 23.0       | 0%       | 100%     |
| 24.0       | 95%      | 5%       |
| 30.0       | 95%      | 5%       |

## 2. Mass Spectrometry conditions:

Electrospray ionisation was used in the positive ion mode (apart from two analytes) with the following parameters: capillary voltage 2.6 kV; desolvation temperature 450°C; desolvation flow 950 L/hr; Cone flow 50 L/hr. The cone voltage and collision energy were optimised for each MRM transition as described in Table 2. MRM transitions were grouped into time windows for MS/MS analysis allowing dwell times to be maintained at >28 msec per transition.

**Table 2. Multiple Reaction Monitoring (MRM):**

| Analyte                 | Retention time (min) | Ion mode | Precursor m/z | Product m/z (quantitation and validation channels) |           | Cone voltage (V) | Collision energy (V) |           |
|-------------------------|----------------------|----------|---------------|----------------------------------------------------|-----------|------------------|----------------------|-----------|
|                         |                      |          |               | Product 1                                          | Product 2 |                  | Product 1            | Product 2 |
| Neopterin               | 2.71                 | +        | 254           | 236                                                | 206       | 38               | 18                   | 18        |
| Quinolinic acid         | 3.39                 | -        | 166           | 122                                                | -         | 23               | 13                   | -         |
| Serotonin               | 6.06                 | +        | 177           | 160                                                | 115       | 15               | 12                   | 25        |
| Kynurenine              | 7.30                 | +        | 209           | 94                                                 | 146       | 23               | 15                   | 18        |
| Tryptophan              | 8.09                 | +        | 205           | 188                                                | 146       | 17               | 10                   | 16        |
| Xanthurenic acid        | 8.10                 | +        | 206           | 178                                                | 132       | 34               | 18                   | 23        |
| 3-OH Anthranilic acid   | 8.22                 | +        | 154           | 136                                                | 108       | 18               | 15                   | 21        |
| Kynurenic acid          | 8.46                 | +        | 190           | 162                                                | -         | 32               | 18                   | -         |
| Quinaldic acid          | 8.63                 | +        | 174           | 146                                                | 128       | 34               | 15                   | 17        |
| 5-OH indole acetic acid | 8.78                 | +        | 192           | 146                                                | 117       | 25               | 15                   | 27        |
| Indoxyl sulfate         | 8.82                 | -        | 212           | 132                                                | 80        | 34               | 18                   | 18        |
| Indole-3-acetic acid    | 10.96                | +        | 176           | 130                                                | -         | 26               | 15                   | -         |
| Cortisol                | 11.58                | +        | 363           | 121                                                | 327       | 32               | 28                   | 18        |
